# Supplementary material
Source: publisher site journal article supplement (https://www.dovepress.com/article/278671)
Supplement: Supplementary file 1 [file get_supplementary_file.php]

**Supplementary Table 1S**. Classification group based on the combinations of *CETP* rs3764261 with *CETP* rs708272

| Group | Number (%) | *CETP* rs3764261(C>A) | *CETP* rs708272 (G>A) |
| --- | --- | --- | --- |
| I | 116 (38.8) | CC | GG or GA |
| II | 148 (49.5) | CC | AA |
|  |  | AA or CA | GG or GA |
| III | 35 (11.7) | AA or CA | AA |

**
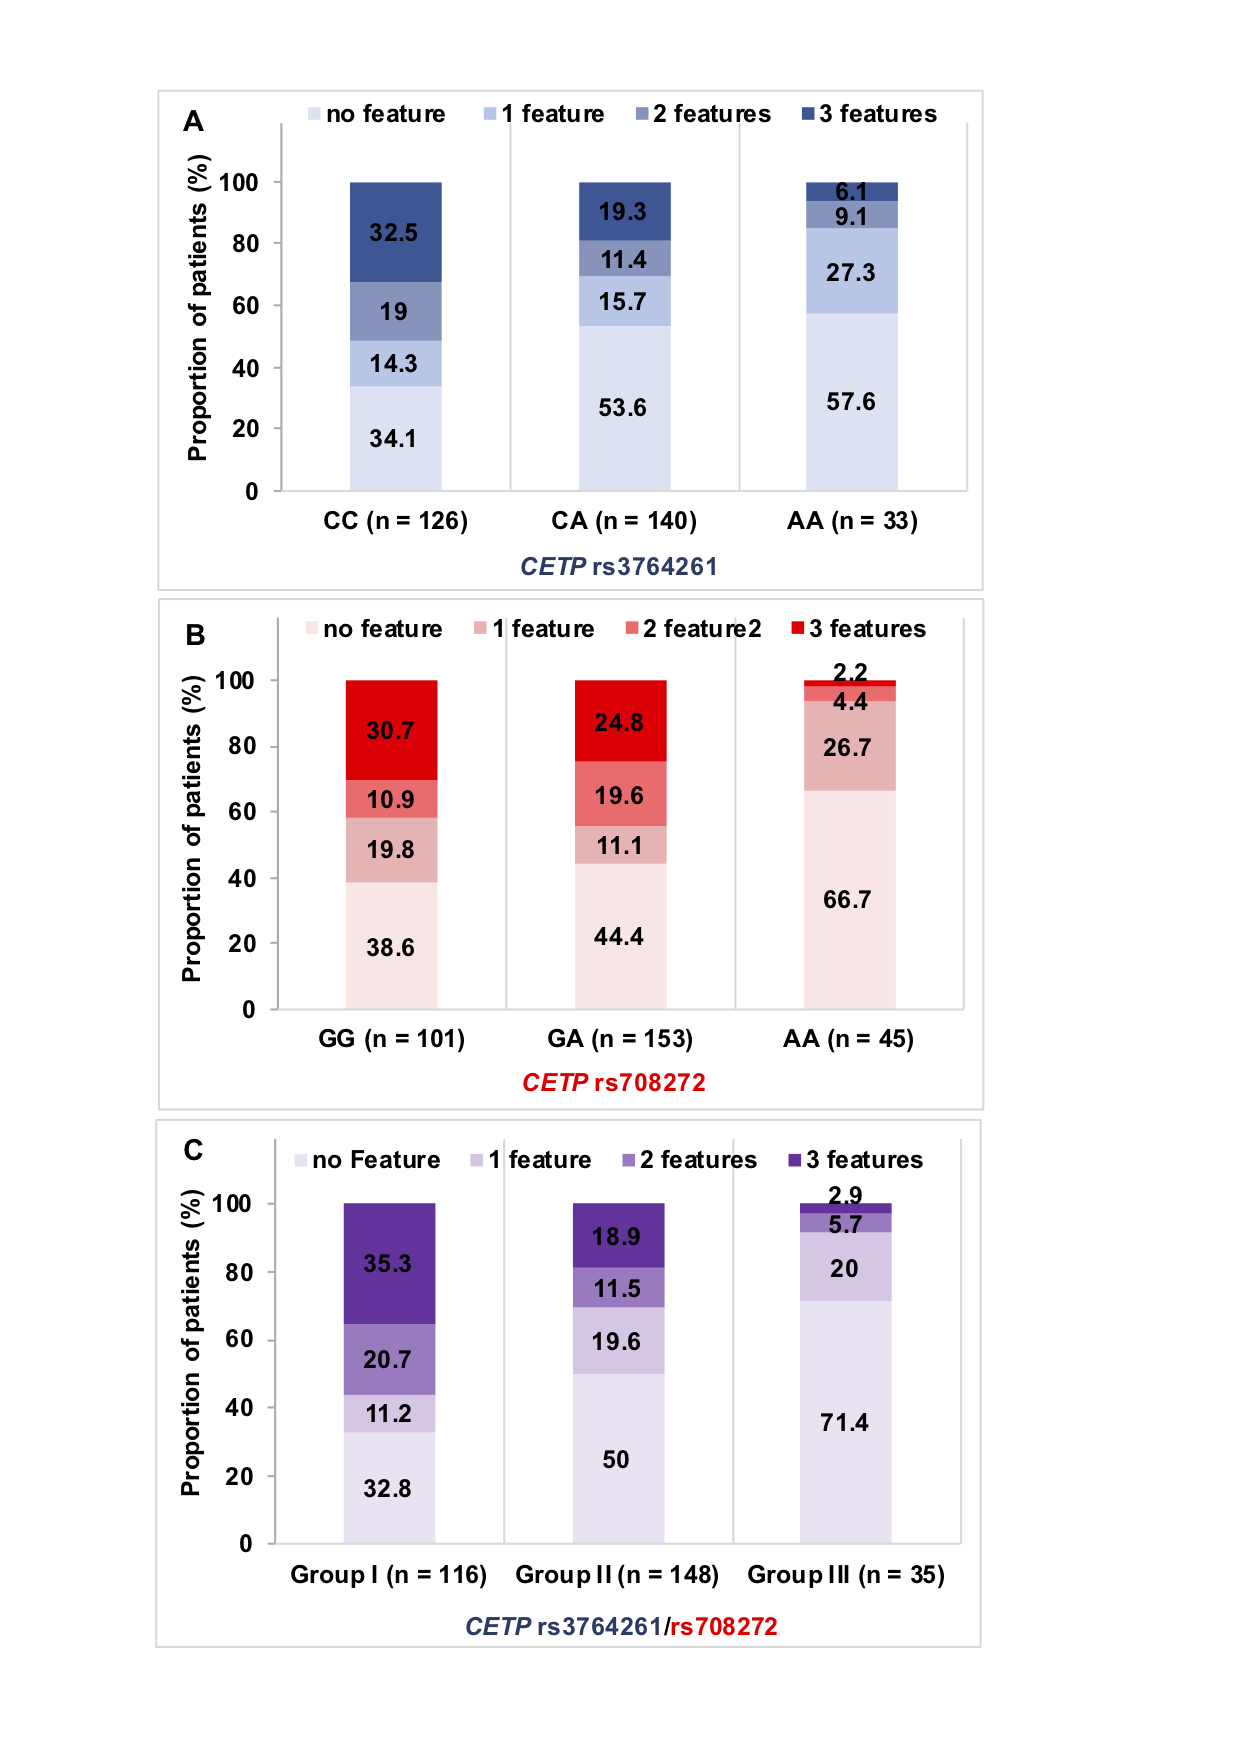
**

**Supplementary Figure 1S**.Proportions of patients without and with various numbers of lipid abnormality features (reduced HDL-C, elevated triglycerides or LDL subclass pattern B) in each genotype of CETP rs3764261 (A); rs708272 (B) and combined rs3764261/rs708272 (C)**.** The detail ofthecombination groups of rs3764261/rs708272 is shown in Supplementary Table 1S.
